# Supplementary material
Source: PubMed Central journal article supplement (PMC6143005)
Supplement: jamaotolaryngolheadnecksurg-144-696-s001.pdf [file jamaotolaryngolheadnecksurg-144-696-s001.pdf]

## Supplementary Online Content

Chang T-P. Schubert MC. Association of the video head impulse test with improvement of dynamic balance and fall risk in patients with dizziness. *JAMA Otolaryngol Head Neck Surg*. Published online June 28, 2018. doi:10.1001/jamaoto.2018.0650

**eTable 1.** Subjective Improvement of Dizziness of the Study Patients

**eTable 2.** Youden Index for Different Cutoff Points of  $\Delta$ VOR and  $\Delta$ DGI To Predict Subjective Improvement of Dizziness

**eFigure.** ROC Analysis for Using  $\Delta$ VOR and  $\Delta$ DGI to Predict Subjective Improvement of Dizziness

This supplementary material has been provided by the authors to give readers additional information about their work.

**eTable 1. Subjective Improvement of Dizziness of the Study Patients**

| Case No. | Age | Gender | Functional Diagnosis | $\Delta$ VOR | $\Delta$ DGI | Improvement of dizziness |
|----------|-----|--------|----------------------|--------------|--------------|--------------------------|
| 1        | 73  | M      | UVH                  | 0.17         | 5            | Yes                      |
| 2        | 71  | F      | UVH                  | 0.18         | 3            | Yes                      |
| 3        | 54  | F      | UVH                  | -0.06        | 3            | No                       |
| 4        | 59  | F      | UVH                  | -0.06        | 1            | No                       |
| 5        | 51  | M      | UVH                  | 0            | 3            | Yes                      |
| 6        | 60  | F      | UVH                  | 0.14         | 3            | Yes                      |
| 7        | 32  | F      | UVH                  | -0.26        | 3            | No                       |
| 8        | 80  | F      | UVH                  | -0.04        | 1            | No                       |
| 9        | 61  | F      | UVH                  | 0            | 3            | Yes                      |
| 10       | 70  | M      | UVH                  | 0            | 3            | Yes                      |
| 11       | 51  | F      | UVH                  | 0.12         | 2            | Yes                      |
| 12       | 62  | M      | UVH                  | -0.02        | 4            | Yes                      |
| 13       | 63  | F      | UVH                  | 0.05         | 2            | Yes                      |
| 14       | 70  | F      | UVH                  | 0.01         | 3            | Yes                      |
| 15       | 84  | M      | UVH                  | -0.01        | 2            | Yes                      |
| 16       | 60  | F      | UVH                  | -0.08        | 2            | Yes                      |
| 17       | 63  | F      | UVH                  | 0.19         | 6            | No                       |
| 18       | 55  | F      | UVH                  | -0.21        | 0            | Yes                      |
| 19       | 82  | M      | BVH                  | -0.25        | -3           | No                       |
| 20       | 77  | F      | BVH                  | -0.12        | -1           | No                       |
| 21       | 66  | M      | BVH                  | -0.18        | -1           | No                       |
| 22       | 66  | F      | BVH                  | -0.04        | -4           | Yes                      |
| 23       | 49  | M      | BVH                  | 0.28         | 6            | Yes                      |
| 24       | 75  | F      | BVH                  | 0.27         | 1            | Yes                      |
| 25       | 83  | F      | BVH                  | 0.095        | 3            | Yes                      |
| 26       | 86  | M      | BVH                  | 0.21         | 3            | No                       |
| 27       | 83  | F      | BVH                  | 0.255        | 2            | Yes                      |
| 28       | 85  | M      | BVH                  | -0.02        | 3            | No                       |
| 29       | 72  | F      | BVH                  | -0.085       | 1            | Yes                      |
| 30       | 30  | F      | DZ                   | 0.115        | 0            | No                       |
| 31       | 67  | F      | DZ                   | -0.06        | 2            | No                       |
| 32       | 77  | M      | DZ                   | 0.075        | 1            | No                       |
| 33       | 67  | M      | DZ                   | 0            | 7            | Yes                      |
| 34       | 82  | F      | DZ                   | -0.19        | -4           | No                       |
| 35       | 51  | F      | DZ                   | -0.065       | -4           | No                       |
| 36       | 53  | F      | DZ                   | -0.015       | 4            | No                       |
| 37       | 45  | F      | DZ                   | 0.08         | 6            | Yes                      |
| 38       | 71  | M      | DZ                   | -0.19        | 2            | No                       |

In this supplementary material, we used receiver operating characteristic (ROC) analysis to test improvement of VOR gain and improvement of DGI in predicting improvement of dizziness. All 38 study patients were questioned at the last follow-up visit, “Is your dizziness improved?”

**eTable 2. Youden Index for Different Cutoff Points of  $\Delta$ VOR and  $\Delta$ DGI To Predict Subjective Improvement of Dizziness**

| Cut-off point | Sensitivity | 1 – Specificity | Youden’s Index |
|---------------|-------------|-----------------|----------------|
| $\Delta$ VOR  |             |                 |                |
| -0.04         | 0.857       | 0.353           | 0.504          |
| -0.02         | 0.810       | 0.294           | 0.516          |
| -0.01         | 0.762       | 0.235           | 0.527          |
| 0.01          | 0.524       | 0.235           | 0.289          |
| 0.03          | 0.476       | 0.235           | 0.241          |
| $\Delta$ DGI  |             |                 |                |
| $\geq 0$      | 0.952       | 0.706           | 0.246          |
| $\geq 1$      | 0.905       | 0.647           | 0.258          |
| $\geq 2$      | 0.810       | 0.471           | 0.339          |
| $\geq 3$      | 0.571       | 0.353           | 0.218          |
| $\geq 4$      | 0.238       | 0.118           | 0.120          |

The best cutoff points for  $\Delta$ VOR and  $\Delta$ DGI to predict improvement of dizziness are -0.01 and 2 and respectively. It is noted that  $\Delta$ DGI  $\geq 1$  is a better cut-off point than  $\Delta$ DGI  $\geq 4$  in predicting subjective dizziness improvement.

**eFigure. ROC Analysis for Using  $\Delta$ VOR and  $\Delta$ DGI to Predict Subjective Improvement of Dizziness**

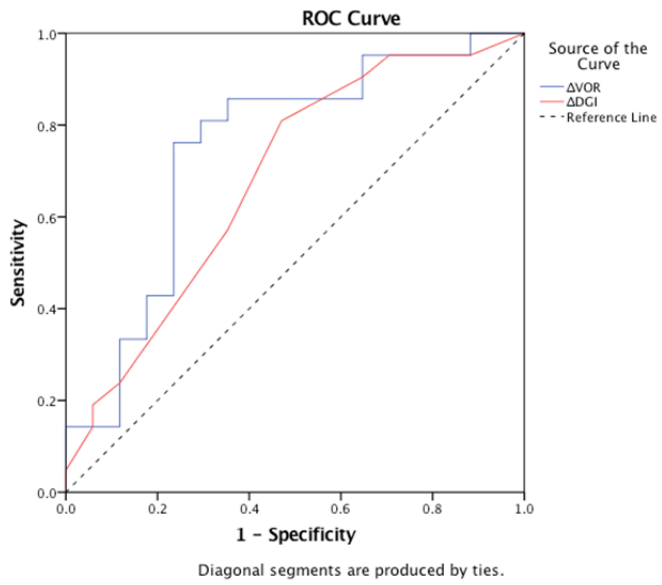

The areas under curve (AUC) are 0.748 for  $\Delta$ VOR and 0.683 for  $\Delta$ DGI.
